# Supplementary material
Source: Springer Nature journal article supplement (https://www.springermedizin.de/resource/supplementary/12967_2014_2113_MOESM15_ESM.pdf/9575066)
Supplement: MOESM15 [file 9575066]

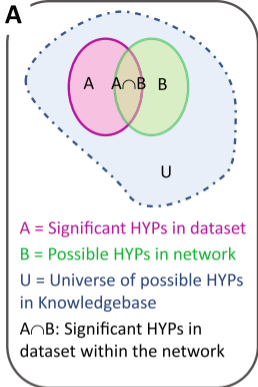

**B**

|              |                 | Universe HYPs      |                            |
|--------------|-----------------|--------------------|----------------------------|
|              |                 | In network         | Not in network             |
| Dataset HYPs | Significant     | $a = A \cap B$     | $b = A - A \cap B$         |
|              | Not significant | $c = B - A \cap B$ | $d = U - A - B + A \cap B$ |

**D**

| V-IPN                       |             |          |      |
|-----------------------------|-------------|----------|------|
| Dataset                     | ID          | Se (Cov) | OR   |
| Mm_Ao_78w_ApoE_vs_wt        | GSE10000    | 0.33     | 2.44 |
| Mm_Ao_16w_ApoE_CS_vs_sham   | E-MTAB-1696 | 0.16     | 1.75 |
| Hs_EC_GFP_oxLDL_vs_ct       | GSE13139    | 0.09     | 1.62 |
| Hs_EC_LOX1_oxLDL_vs_ct      | GSE13139    | 0.15     | 1.99 |
| Hs_EC_oxPAP_vs_ct           | GSE20060    | 0.23     | 2.32 |
| Hs_athCA_vs_ctIMA           | GSE40231    | 0.24     | 2.47 |
| Hs_NHBE_CDKinH_rel_vs_bk_8h | E-MTAB-1272 | 0.16     | 1.39 |
| Hs_MVEC-C_hpx_vs_ct_24h     | GSE11341    | 0.14     | 2.20 |
| Hs_MVEC-L_hpx_vs_ct_24h     | GSE11341    | 0.12     | 1.73 |
| Hs_JurkT_ars_vs_ct          | GSE46909    | 0.09     | 1.55 |

**C**

|                                                     |
|-----------------------------------------------------|
| - Sensitivity (Coverage) = $a/(a+c) = A \cap B / B$ |
| - OR = $\frac{a/b}{c/d}$                            |
